# Supplementary material for: Synthesis of highly strained terpenes by non-stop tail-to-head polycyclization
Source: Springer Nature journal article supplement (doi:10.1038/nchem.1458), 2012-09-21
Supplement: 41557_2012_BFnchem1458_MOESM35_ESM.mol [file 41557_2012_BFnchem1458_MOESM35_ESM.mol]

  ChemDraw08301214062D

 30 33  0  0  0  0  0  0  0  0999 V2000
    2.4503    2.6745    0.0000 C   0  0  0  0  0  0  0  0  0  0  0  0
    1.6657    2.9294    0.0000 C   0  0  0  0  0  0  0  0  0  0  0  0
    1.1807    2.2620    0.0000 C   0  0  0  0  0  0  0  0  0  0  0  0
    1.6657    1.5945    0.0000 C   0  0  0  0  0  0  0  0  0  0  0  0
    2.4503    1.8495    0.0000 C   0  0  0  0  0  0  0  0  0  0  0  0
    0.3961    2.0071    0.0000 C   0  0  0  0  0  0  0  0  0  0  0  0
    0.3961    1.1820    0.0000 C   0  0  0  0  0  0  0  0  0  0  0  0
    1.1807    0.9271    0.0000 C   0  0  0  0  0  0  0  0  0  0  0  0
    0.4798    2.6971    0.0000 C   0  0  0  0  0  0  0  0  0  0  0  0
   -0.3004    1.6243    0.0000 C   0  0  0  0  0  0  0  0  0  0  0  0
   -0.2988    2.4493    0.0000 C   0  0  0  0  0  0  0  0  0  0  0  0
    1.4107    3.7141    0.0000 C   0  0  0  0  0  0  0  0  0  0  0  0
    1.8532    0.4491    0.0000 C   0  0  0  0  0  0  0  0  0  0  0  0
    0.9857    0.1255    0.0000 C   0  0  0  0  0  0  0  0  0  0  0  0
   -1.0238    1.2276    0.0000 C   0  0  0  0  0  0  0  0  0  0  0  0
   -1.0238    0.4026    0.0000 N   0  0  0  0  0  0  0  0  0  0  0  0
    2.2490    1.0112    0.0000 H   0  0  0  0  0  0  0  0  0  0  0  0
   -1.7358   -0.0085    0.0000 N   0  0  0  0  0  0  0  0  0  0  0  0
   -1.7358   -0.8307    0.0000 C   0  0  0  0  0  0  0  0  0  0  0  0
   -2.4503   -1.2432    0.0000 C   0  0  0  0  0  0  0  0  0  0  0  0
   -2.4503   -2.0682    0.0000 C   0  0  0  0  0  0  0  0  0  0  0  0
   -1.7358   -2.4807    0.0000 C   0  0  0  0  0  0  0  0  0  0  0  0
   -1.0214   -2.0682    0.0000 C   0  0  0  0  0  0  0  0  0  0  0  0
   -1.0214   -1.2432    0.0000 C   0  0  0  0  0  0  0  0  0  0  0  0
   -1.7358   -3.3030    0.0000 N   0  3  0  0  0  0  0  0  0  0  0  0
   -1.0238   -3.7141    0.0000 O   0  0  0  0  0  0  0  0  0  0  0  0
   -2.4479   -3.7141    0.0000 O   0  5  0  0  0  0  0  0  0  0  0  0
   -0.3093   -0.8321    0.0000 N   0  3  0  0  0  0  0  0  0  0  0  0
   -0.3093   -0.0099    0.0000 O   0  0  0  0  0  0  0  0  0  0  0  0
    0.4028   -1.2432    0.0000 O   0  5  0  0  0  0  0  0  0  0  0  0
  1  2  1  0      
  2  3  1  0      
  3  4  1  0      
  4  5  1  0      
  5  1  1  0      
  3  6  1  1      
  7  6  1  1      
  7  8  1  0      
  8  4  1  0      
  3  9  1  0      
  7 10  1  0      
 10 11  1  0      
 11  9  1  0      
  2 12  1  1      
  8 13  1  0      
  8 14  1  0      
 10 15  1  6      
 15 16  2  0      
  4 17  1  6      
 16 18  1  0      
 18 19  1  0      
 19 20  2  0      
 20 21  1  0      
 21 22  2  0      
 22 23  1  0      
 23 24  2  0      
 24 19  1  0      
 24 28  1  0      
 22 25  1  0      
 25 26  2  0      
 25 27  1  0      
 28 29  2  0      
 28 30  1  0      
M  CHG  4  25   1  27  -1  28   1  30  -1
M  END
